# Supplementary material for: Mesoporous CuO–NiO micropolyhedrons: facile synthesis, morphological evolution and pseudocapcitive performance
Source: Royal Society of Chemistry journal article supplement (doi:10.1039/c3ce41744a), 2013-10-25

## Supplementary Information

### Mesoporous CuO-NiO Micropolyhedrons: Facile Synthesis, Morphological Evolution and Pseudocapacitive Performance

Yu Xin Zhang<sup>a,b,\*</sup>, Min Kuang<sup>a</sup>, Jun Jie Wang<sup>a</sup>

**SI-1** The detailed synthetic conditions of various CuO-NiO composites

| Sample             | Cu(NO <sub>3</sub> ) <sub>2</sub><br>(mL) | Ni(NO <sub>3</sub> ) <sub>2</sub><br>(mL) | Na <sub>2</sub> C <sub>2</sub> O <sub>4</sub><br>(mL) | EG<br>(mL) | Time<br>(h) | Temperature<br>(°C) |
|--------------------|-------------------------------------------|-------------------------------------------|-------------------------------------------------------|------------|-------------|---------------------|
| Cu400              | 20                                        | 0                                         | 20                                                    | 30         | 2           | 400                 |
| CuNi400(Cu/Ni=3)   | 15                                        | 5                                         | 20                                                    | 30         | 2           | 400                 |
| CuNi400(Cu/Ni=1)   | 10                                        | 10                                        | 20                                                    | 30         | 2           | 400                 |
| CuNi400(Cu/Ni=1/3) | 5                                         | 15                                        | 20                                                    | 30         | 2           | 400                 |
| CuNi350(Cu/Ni=1)   | 10                                        | 10                                        | 20                                                    | 30         | 2           | 350                 |
| CuNi500(Cu/Ni=1)   | 10                                        | 10                                        | 20                                                    | 30         | 2           | 500                 |

**SI-2** TEM image for CuNi400(Cu/Ni=1) along with the line TEM EDX analysis (a and b), and the corresponding Cu (c), Ni (d) and O (e) line analyses TEM EDX.

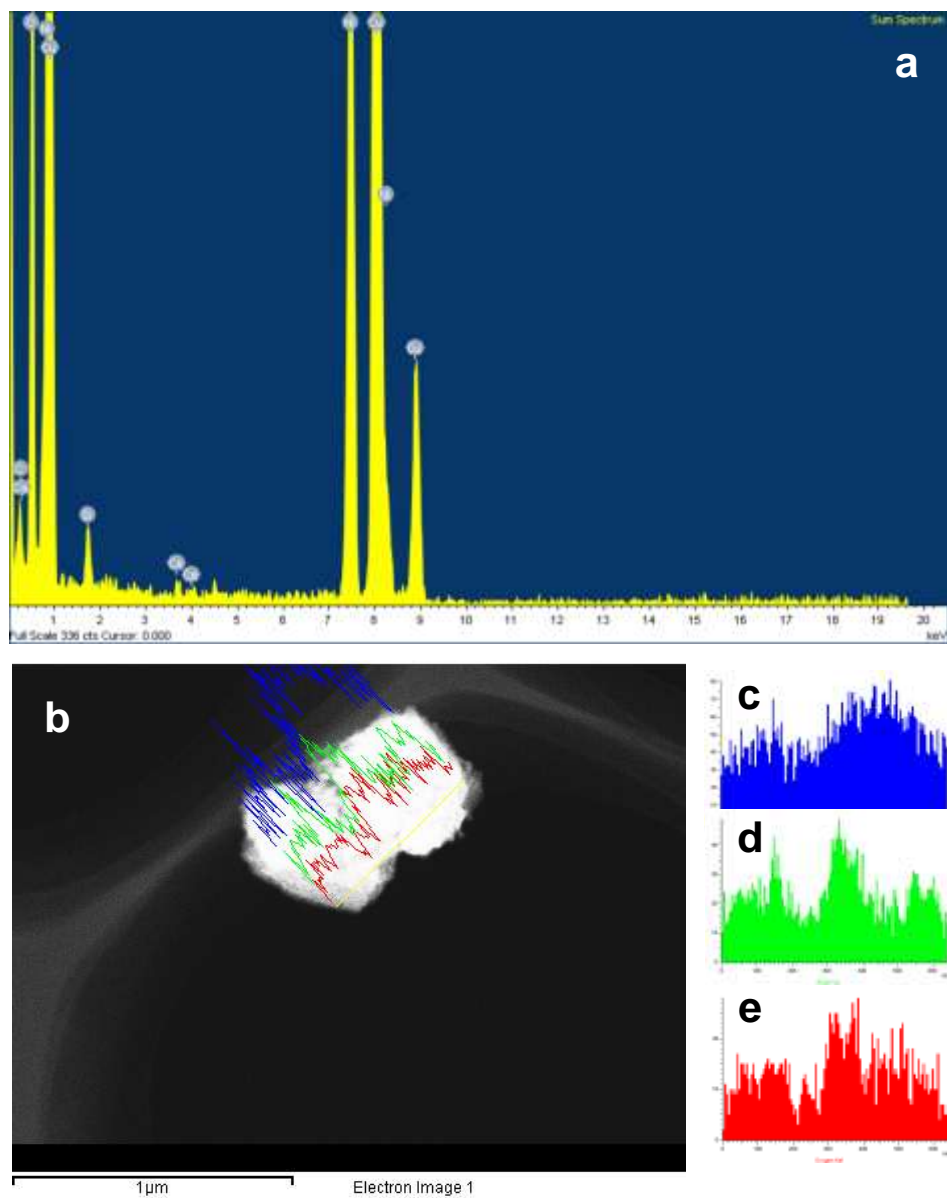

SI-3 XRD pattern (a) and SEM image (b) of CuNi400 (Cu/Ni=1/3)

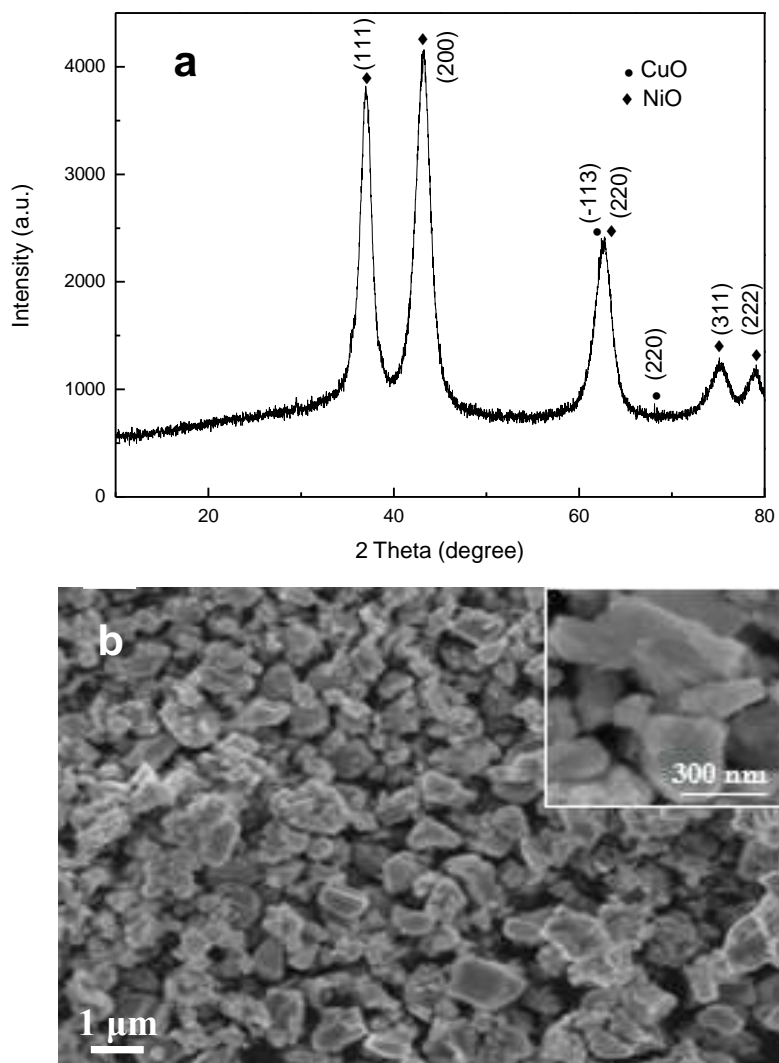

**SI-4** The selected-area electron diffraction (SAED) pattern of CuO-NiO micropolyhedrons (CuNi400 (Cu/Ni=1)).

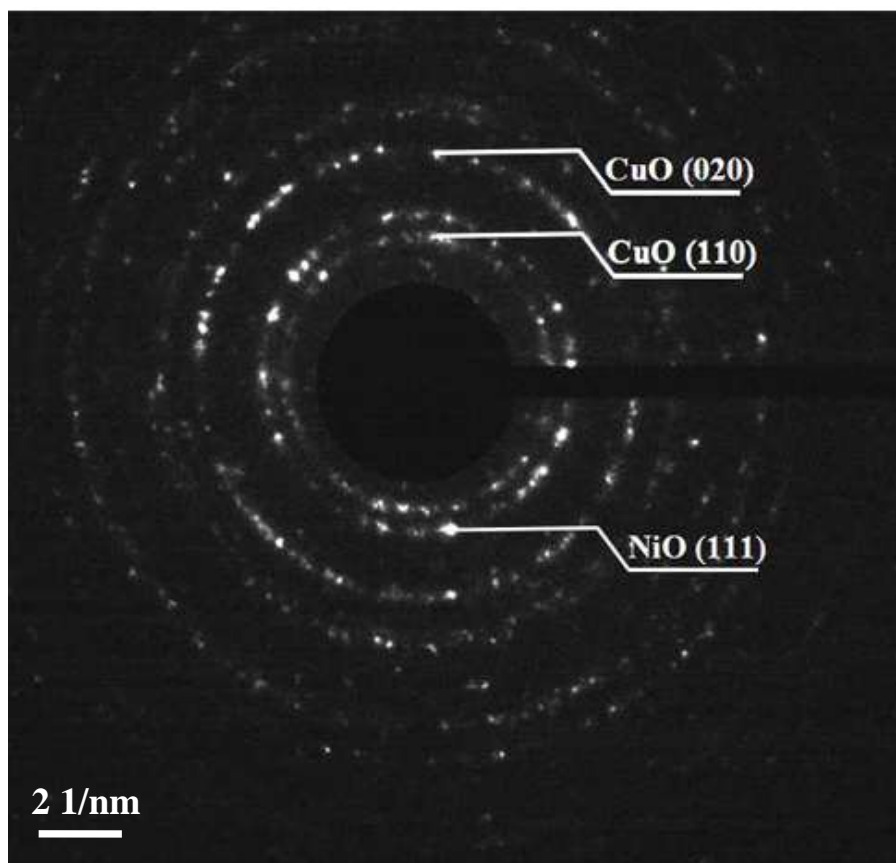

**SI-5** Pore volume (V) for three samples obtained with different calcination temperature.

| Sample           | V (cm <sup>3</sup> /g) |                   |                    |                    |
|------------------|------------------------|-------------------|--------------------|--------------------|
|                  | Total                  | Micro-<br>(<2 nm) | Meso-<br>(2-50 nm) | Macro-<br>(>50 nm) |
| CuNi350(Cu/Ni=1) | 0.34                   | 1.58%             | 58.16%             | 40.26%             |
| CuNi400(Cu/Ni=1) | 0.19                   | —                 | 63.16%             | 36.84%             |
| CuNi500(Cu/Ni=1) | 0.13                   | —                 | 36.6%              | 63.4%              |

**SI-6** Cyclic voltammetry curves of Cu400, CuNi400(Cu/Ni=3) and CuNi400(Cu/Ni=1) at a scan rate of  $5 \text{ mV s}^{-1}$ .

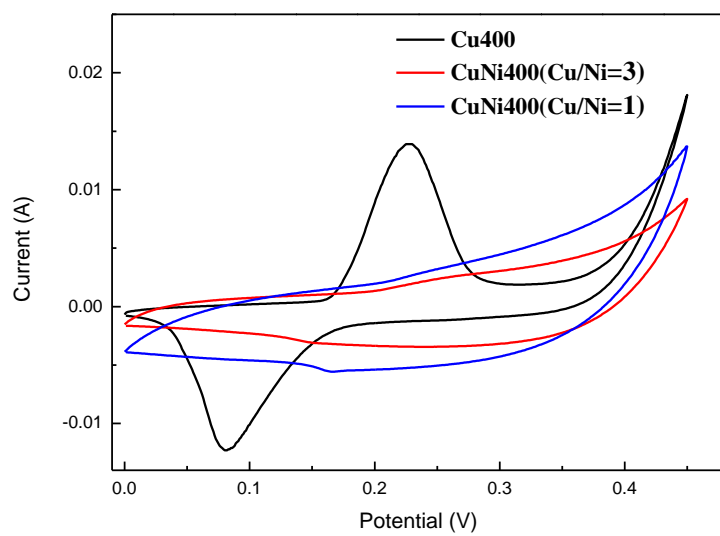

**SI-7** The galvanostatic charge-discharge curves of Cu400, CuNi400(Cu/Ni=3) and CuNi400(Cu/Ni=1) at a current density of  $2 \text{ mA cm}^{-2}$ .

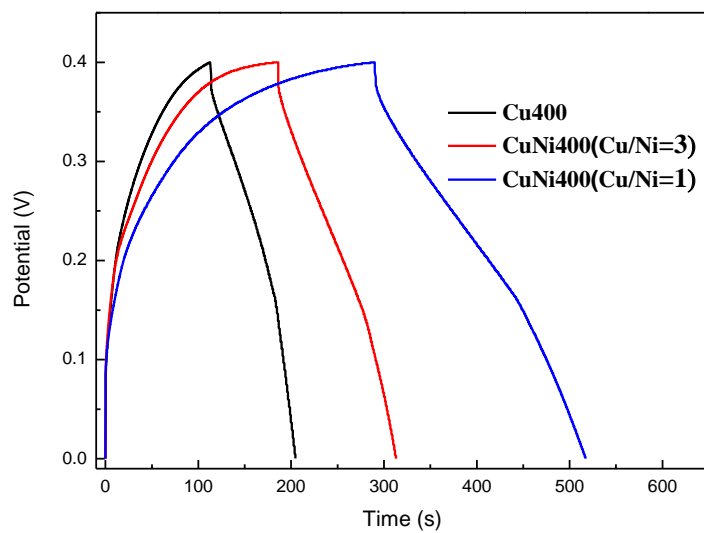

Supplement: c3ce41744a.pdf [file c3ce41744a.pdf]
